# Supplementary material for: Efficacy of a Combination of N-Palmitoylethanolamide, Beta-Caryophyllene, Carnosic Acid, and Myrrh Extract on Chronic Neuropathic Pain: A Preclinical Study
Source: Front Pharmacol. 2019 Jun 27;10:711. doi: 10.3389/fphar.2019.00711 (PMC6610250; doi:10.3389/fphar.2019.00711)
Supplement: Supplementary file 2 [file Table_2.pdf]

|                                                                                                                                                                                                                                        |                            |                                                                                    |
|----------------------------------------------------------------------------------------------------------------------------------------------------------------------------------------------------------------------------------------|----------------------------|------------------------------------------------------------------------------------|
| Codice prodotto: PNF01                                                                                                                                                                                                                 |                            | 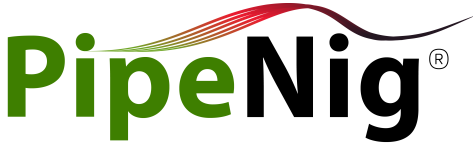 |
| Pipenig® -FL                                                                                                                                                                                                                           |                            |                                                                                    |
| Estratto fluido di <i>Piper nigrum</i> ad elevato contenuto di $\beta$ -cariofillene                                                                                                                                                   |                            |                                                                                    |
| Data di Emissione: Aprile 2017                                                                                                                                                                                                         |                            |                                                                                    |
| Nome botanico e origine: <i>Piper nigrum</i> L. ; India                                                                                                                                                                                |                            | Numero CAS: 84929-41-9                                                             |
| Parte utilizzata <i>fructus, oleum</i>                                                                                                                                                                                                 |                            | EINECS: 284-524-7                                                                  |
| Sito di produzione: Italia                                                                                                                                                                                                             |                            | Codice NC: 1302197000                                                              |
| SPECIFICHE DEL PRODOTTO                                                                                                                                                                                                                |                            |                                                                                    |
| Solvente d'estrazione: Acqua                                                                                                                                                                                                           |                            |                                                                                    |
| PRINCIPI ATTIVI                                                                                                                                                                                                                        | Parametro                  | Metodo di analisi                                                                  |
| $\beta$ -cariofillene (CAS: 87-44-5; EINECS: 201-746-1)                                                                                                                                                                                | $\geq 800$ g/Kg (80%)      | GC-MS/FID                                                                          |
| $\alpha$ -cariofillene ( $\alpha$ -umulene) (CAS: 6756-98-6; EINECS: 229-816-7)                                                                                                                                                        | $\geq 20$ g/Kg (2%)        | GC-MS/FID                                                                          |
| Altri terpeni<br>$\alpha$ -Pinene (CAS: 80-56-8; EINECS: 201-291-9)<br>$\beta$ -Pinene (CAS: 127-91-3; EINECS: 204-872-5)<br>D,L-Limonene (CAS: 5989-27-5; EINECS: 227-813-5)<br>$\alpha$ -copaene (CAS: 3856-25-5; EINECS: 223-364-4) | $\leq 50$ g/Kg (5%)        | GC-MS/FID                                                                          |
| SPECIFICHE GENERALI                                                                                                                                                                                                                    | Parametro                  | Metodo di analisi                                                                  |
| Aspetto                                                                                                                                                                                                                                | Liquido giallo paglierino  | Ispezione                                                                          |
| Ceneri                                                                                                                                                                                                                                 | < 1%                       | 600 °C - 6 ore                                                                     |
| Residuo solventi (Reg. 32/2009)                                                                                                                                                                                                        |                            |                                                                                    |
| Etanolo                                                                                                                                                                                                                                | Assente                    |                                                                                    |
| Metanolo                                                                                                                                                                                                                               | Assente                    |                                                                                    |
| Metalli pesanti                                                                                                                                                                                                                        |                            |                                                                                    |
| Pb                                                                                                                                                                                                                                     | < 3 ppm                    | Assorbimento atomico                                                               |
| Cd                                                                                                                                                                                                                                     | < 1 ppm                    | Assorbimento atomico                                                               |
| Hg                                                                                                                                                                                                                                     | < 0,1 ppm                  | Assorbimento atomico                                                               |
| As                                                                                                                                                                                                                                     | < 1 ppm                    | Assorbimento atomico                                                               |
| Contaminazioni microbiche                                                                                                                                                                                                              |                            |                                                                                    |
| TAMC                                                                                                                                                                                                                                   | $\leq 5 \times 10^4$ cfu/g | come per Eur.Ph                                                                    |
| TYMC                                                                                                                                                                                                                                   | < 100 cfu/g                | come per Eur.Ph                                                                    |
| Batteri gram-negativi resistenti ai sali biliari                                                                                                                                                                                       | < 100 cfu/g                | come per Eur.Ph                                                                    |
| <i>Escherichia coli</i> (1 g)                                                                                                                                                                                                          | Assente                    | come per Eur.Ph                                                                    |
| Salmonella (25 g)                                                                                                                                                                                                                      | Assente                    | come per Eur.Ph                                                                    |
| Cross Contamination                                                                                                                                                                                                                    | Assente                    |                                                                                    |

|                                        |         |           |
|----------------------------------------|---------|-----------|
| Eccipienti                             |         |           |
| Olio di riso ( <i>Oryza sativa</i> L.) | 2-15%   | Ponderale |
| Sostanze ausiliari                     | Assente |           |
| Conservanti                            | Assente |           |

| SPECIFICHE GENERALI                              | Parametro                                                                                                                                                                                                                                                                                                                                                                                                                                                                                        | Metodo di analisi        |
|--------------------------------------------------|--------------------------------------------------------------------------------------------------------------------------------------------------------------------------------------------------------------------------------------------------------------------------------------------------------------------------------------------------------------------------------------------------------------------------------------------------------------------------------------------------|--------------------------|
| Aflatossine                                      |                                                                                                                                                                                                                                                                                                                                                                                                                                                                                                  |                          |
| Aflatossina B1                                   | < 5 ppb                                                                                                                                                                                                                                                                                                                                                                                                                                                                                          | MI 118/13 rev 1 del 2013 |
| Aflatossine totali<br>(somma di B1, B2, G1 e G2) | < 10 ppb                                                                                                                                                                                                                                                                                                                                                                                                                                                                                         | MI_118/13 rev 1 del 2013 |
| Glutine                                          | ≤ 20 ppm                                                                                                                                                                                                                                                                                                                                                                                                                                                                                         | E.L.I.S.A.               |
| Residuo di pesticidi                             | In accordo con Reg. (EC) No 396/2005 e successive modifiche                                                                                                                                                                                                                                                                                                                                                                                                                                      | GC-MS                    |
| <b>ALTRE INFORMAZIONI</b>                        |                                                                                                                                                                                                                                                                                                                                                                                                                                                                                                  |                          |
| Trattamenti conservativi                         | Il prodotto non è né irradiato né sottoposto a trattamento con ossido di etilene                                                                                                                                                                                                                                                                                                                                                                                                                 |                          |
| BSE/TSE/<br>Vegetariani/Vegani                   | Il prodotto non contiene materiale di origine animale o implica direttamente e volontariamente l'uccisione, la detenzione o lo sfruttamento di animali.                                                                                                                                                                                                                                                                                                                                          |                          |
| Nanomateriali                                    | Il prodotto non contiene e non è stato fabbricato utilizzando nanomateriali (Reg.CE N° 1169/2011)                                                                                                                                                                                                                                                                                                                                                                                                |                          |
| Autocontrollo                                    | Prodotto sottoposto al regime previsto dal programma aziendale di autocontrollo come da pacchetto di igiene Reg. (CE) 852/2004                                                                                                                                                                                                                                                                                                                                                                   |                          |
| OGM                                              | Il prodotto non contiene e non è stato fabbricato utilizzando organismi geneticamente modificati (EEC Reg. 1829/2003 e 1830/2003)                                                                                                                                                                                                                                                                                                                                                                |                          |
| Conservazione                                    | Conservare in luogo fresco, asciutto e ventilato, al riparo dalla luce, nei contenitori originali, ben chiusi e lontano da fonti di calore. Sigillare la confezione dopo l'uso.                                                                                                                                                                                                                                                                                                                  |                          |
| Interazioni con farmaci                          | Non sono disponibili informazioni che permettano di stabilire le precauzioni di carattere generale o precauzioni specifiche concernenti interazioni con farmaci, gli effetti teratogeni o non teratogeni in gravidanza, l'allattamento o l'uso pediatrico. Per ulteriori informazioni consultare anche la monografia su Pipenig® prodotta da Biosfered S.r.l. (www.biosfered.com). Questa nota non costituisce parere medico, che va comunque consultato all'insorgenza di un qualsiasi sintomo. |                          |
| Controindicazioni e avvertenze                   | Ipersensibilità accertata verso il prodotto                                                                                                                                                                                                                                                                                                                                                                                                                                                      |                          |
| Finalità fisiologiche e salutistiche             | Consultare la monografia su Pipenig® prodotta da Biosfered S.r.l. (www.biosfered.com)                                                                                                                                                                                                                                                                                                                                                                                                            |                          |
| Confezionamento                                  | Bottiglie idonee al contatto o al confezionamento di prodotti alimentari.                                                                                                                                                                                                                                                                                                                                                                                                                        |                          |
| Data di retest                                   | 2 anni dalla data di produzione                                                                                                                                                                                                                                                                                                                                                                                                                                                                  |                          |

| Allergene (Reg. 1169/2011)                                                                          | ESISTE NEL<br>PRODOTTO? | ESISTE NELLA LINEA<br>PRODUTTIVA? | ESISTE NEL LUOGO DI<br>STOCCAGGIO? |
|-----------------------------------------------------------------------------------------------------|-------------------------|-----------------------------------|------------------------------------|
| Biossido di zolfo e solfiti (specificare la quantità se più alta di 10 ppm o 10 mg/kg)              | NO                      | NO                                | NO                                 |
| Cereali contenenti glutine                                                                          | NO                      | NO                                | NO                                 |
| Di semi di arachidi e prodotti derivati (compreso l'olio)                                           | NO                      | NO                                | NO                                 |
| Anacardio - guscio (compreso l'olio)                                                                | NO                      | NO                                | NO                                 |
| Noce (compreso l'olio)                                                                              | NO                      | NO                                | NO                                 |
| Nocciola (compreso l'olio)                                                                          | NO                      | NO                                | NO                                 |
| Noce brasiliana (compreso l'olio)                                                                   | NO                      | NO                                | NO                                 |
| Noce Pecan (compreso l'olio)                                                                        | NO                      | NO                                | NO                                 |
| Noce Macadamia (compreso l'olio)                                                                    | NO                      | NO                                | NO                                 |
| Pistacchio - noce (compreso l'olio)                                                                 | NO                      | NO                                | NO                                 |
| Pinoli (compreso l'olio)                                                                            | NO                      | NO                                | NO                                 |
| Mandorla (compreso l'olio)                                                                          | NO                      | NO                                | NO                                 |
| Uova e prodotti derivati                                                                            | NO                      | NO                                | NO                                 |
| Mollusco e prodotti derivati                                                                        | NO                      | NO                                | NO                                 |
| Pesci-crostei e prodotti derivati (inclusa gelatina)                                                | NO                      | NO                                | NO                                 |
| Soia e prodotti derivati (incluso lecitine)                                                         | NO                      | NO                                | NO                                 |
| Latte e prodotti lattiero-caseari contenenti lattosio (In caso di presenza specificare la quantità) | NO                      | NO                                | NO                                 |
| Semi di sesamo e prodotti derivati (compreso l'olio)                                                | NO                      | NO                                | NO                                 |
| Lupini (lat. <i>Lupinus</i> ) e prodotti derivati                                                   | NO                      | NO                                | NO                                 |
| Sedano e prodotti derivati                                                                          | NO                      | NO                                | NO                                 |
| Senape e prodotti derivati                                                                          | NO                      | NO                                | NO                                 |
| Lattice                                                                                             | NO                      | NO                                | NO                                 |

Gli eventuali metodi d'analisi non riportati sono metodi interni del produttore ottenibili su specifica richiesta. Le informazioni sopra riportate non Vi sollevano dall'obbligo di identificare il prodotto prima dell'impiego. La nostra società non si assume alcuna responsabilità per danni a persone o cose derivanti dall'impiego dei prodotti da noi commercializzati. Questo documento è proprietà esclusiva di Biosfered S.r.l. ed ogni utilizzo non autorizzato sarà perseguito ai fini di legge. Le informazioni contenute in questo documento sono da intendersi riservate al solo ambito professionale e quindi non divulgabili al pubblico.
