# Supplementary material for: Efficacy of a Combination of N-Palmitoylethanolamide, Beta-Caryophyllene, Carnosic Acid, and Myrrh Extract on Chronic Neuropathic Pain: A Preclinical Study
Source: Front Pharmacol. 2019 Jun 27;10:711. doi: 10.3389/fphar.2019.00711 (PMC6610250; doi:10.3389/fphar.2019.00711)
Supplement: Supplementary file 3 [file Table_3.pdf]

|                                                                                            |                                                                 |                                                                                      |
|--------------------------------------------------------------------------------------------|-----------------------------------------------------------------|--------------------------------------------------------------------------------------|
| Codice prodotto: CMP02                                                                     |                                                                 | <div>MyrLIQ<sup>®</sup>-PWD</div> <div>ESTRATTO SECCO DI<br/>COMMIPHORA MYRRHA</div> |
| MyrLiq <sup>®</sup> -PWD                                                                   |                                                                 |                                                                                      |
| Estratto secco di Gommoresine di <i>Commiphora myrrha</i> ad alto contenuto di furanodieni |                                                                 |                                                                                      |
| Data di Emissione:                                                                         | Gennaio 2016                                                    |                                                                                      |
| Nome botanico e origine:                                                                   | <i>Commiphora myrrha</i> (Nees) Engl.; Nord-Est Africa          | Numero CAS: 84929-26-0                                                               |
| Tempo balsamico e parte utilizzata                                                         | Settembre-Giugno da piante spontanee; <i>oleum-gummi-resina</i> | EINECS: 284-510-0                                                                    |
| Sito di produzione:                                                                        | Italia                                                          | Codice NC: 1302197000                                                                |
| SPECIFICHE DEL PRODOTTO                                                                    |                                                                 |                                                                                      |
| Solvente d'estrazione:                                                                     | Etanolo/Acqua                                                   | Rapporto d'estrazione: 3:1                                                           |
| PRINCIPI ATTIVI                                                                            | Parametro                                                       | Metodo di analisi                                                                    |
| Furanodieni totali                                                                         | ≥ 40 g/ Kg                                                      | GC-MS/FID                                                                            |
| Curzerene                                                                                  | ≥ 20%                                                           | GC-MS/FID                                                                            |
| Furanoeudesma-1,3-diene                                                                    | ≥ 30%                                                           | GC-MS/FID                                                                            |
| Lindestrene                                                                                | ≥ 8%                                                            | GC-MS/FID                                                                            |
| Altri furanodieni                                                                          | ≥ 5%                                                            | GC-MS/FID                                                                            |
| SPECIFICHE GENERALI                                                                        | Parametro                                                       | Metodo di analisi                                                                    |
| Aspetto                                                                                    | Polvere gialla                                                  | Ispezione                                                                            |
| Particle size                                                                              | ≥ 60 mesh                                                       | Setacciamento                                                                        |
| Perdita in peso                                                                            | < 9%                                                            | 105 °C - 3 ore                                                                       |
| Ceneri                                                                                     | < 3%                                                            | 600 °C - 6 ore                                                                       |
| Tapped Bulk Density                                                                        | 525-565 kg/m <sup>3</sup>                                       | WHO QAS/11.450 3.6                                                                   |
| Residuo solventi                                                                           |                                                                 |                                                                                      |
| Etanolo                                                                                    | ≤ 3 %                                                           | GC-FID                                                                               |
| Metanolo                                                                                   | < 10 ppm                                                        | GC-FID                                                                               |
| Metalli pesanti                                                                            |                                                                 |                                                                                      |
| Pb                                                                                         | < 3 ppm                                                         | Assorbimento atomico                                                                 |
| Cd                                                                                         | < 1 ppm                                                         | Assorbimento atomico                                                                 |
| Hg                                                                                         | < 0,1 ppm                                                       | Assorbimento atomico                                                                 |
| As                                                                                         | < 1 ppm                                                         | Assorbimento atomico                                                                 |
| Contaminazioni microbiche                                                                  |                                                                 |                                                                                      |
| TAMC                                                                                       | ≤ 5 x 10 <sup>4</sup> cfu/g                                     | come per Eur.Ph                                                                      |
| TYMC                                                                                       | < 100 cfu/g                                                     | come per Eur.Ph                                                                      |
| Batteri gram-negativi resistenti ai sali biliari                                           | < 100 cfu/g                                                     | come per Eur.Ph                                                                      |
| <i>Escherichia coli</i> (1 g)                                                              | Assente                                                         | come per Eur.Ph                                                                      |
| <i>Salmonella</i> (25 g)                                                                   | Assente                                                         | come per Eur.Ph                                                                      |
| Cross Contamination                                                                        | Assente                                                         |                                                                                      |
| Eccipienti                                                                                 |                                                                 |                                                                                      |
| Proteine di riso ( <i>Oryza sativa</i> L.), <i>semen</i>                                   | ≤ 90%                                                           | Ponderale                                                                            |
| Sostanze ausiliari                                                                         | Assente                                                         |                                                                                      |
| Conservanti                                                                                | Assente                                                         |                                                                                      |

| SPECIFICHE GENERALI                                                                                                                                                                                                                                                                                                                                                                                                                                                                                                                                                                                                                                        | Parametro                                                                                                                                                                                                                                                                                                                                                                                                                                                                                       | Metodo di analisi        |                                   |                                    |
|------------------------------------------------------------------------------------------------------------------------------------------------------------------------------------------------------------------------------------------------------------------------------------------------------------------------------------------------------------------------------------------------------------------------------------------------------------------------------------------------------------------------------------------------------------------------------------------------------------------------------------------------------------|-------------------------------------------------------------------------------------------------------------------------------------------------------------------------------------------------------------------------------------------------------------------------------------------------------------------------------------------------------------------------------------------------------------------------------------------------------------------------------------------------|--------------------------|-----------------------------------|------------------------------------|
| Aflatossine                                                                                                                                                                                                                                                                                                                                                                                                                                                                                                                                                                                                                                                |                                                                                                                                                                                                                                                                                                                                                                                                                                                                                                 |                          |                                   |                                    |
| Aflatossina B1                                                                                                                                                                                                                                                                                                                                                                                                                                                                                                                                                                                                                                             | < 5 ppb                                                                                                                                                                                                                                                                                                                                                                                                                                                                                         | MI 118/13 rev 1 del 2013 |                                   |                                    |
| Aflatossine totali<br>(somma di B1, B2, G1 e G2)                                                                                                                                                                                                                                                                                                                                                                                                                                                                                                                                                                                                           | < 10 ppb                                                                                                                                                                                                                                                                                                                                                                                                                                                                                        | MI_118/13 rev 1 del 2013 |                                   |                                    |
| Glutine                                                                                                                                                                                                                                                                                                                                                                                                                                                                                                                                                                                                                                                    | ≤ 20 ppm                                                                                                                                                                                                                                                                                                                                                                                                                                                                                        | E.L.I.S.A.               |                                   |                                    |
| Residuo di pesticidi                                                                                                                                                                                                                                                                                                                                                                                                                                                                                                                                                                                                                                       | In accordo con Reg. (EC) No 396/2005 e successive modifiche                                                                                                                                                                                                                                                                                                                                                                                                                                     | GC-MS                    |                                   |                                    |
| ALTRE INFORMAZIONI                                                                                                                                                                                                                                                                                                                                                                                                                                                                                                                                                                                                                                         |                                                                                                                                                                                                                                                                                                                                                                                                                                                                                                 |                          |                                   |                                    |
| Trattamenti conservativi                                                                                                                                                                                                                                                                                                                                                                                                                                                                                                                                                                                                                                   | Il prodotto non è né irradiato né sottoposto a trattamento con ossido di etilene                                                                                                                                                                                                                                                                                                                                                                                                                |                          |                                   |                                    |
| BSE/TSE/<br>Vegetariani/Vegani                                                                                                                                                                                                                                                                                                                                                                                                                                                                                                                                                                                                                             | Il prodotto non contiene materiale di origine animale o implica direttamente e volontariamente l'uccisione, la detenzione o lo sfruttamento di animali.                                                                                                                                                                                                                                                                                                                                         |                          |                                   |                                    |
| Nanomateriali                                                                                                                                                                                                                                                                                                                                                                                                                                                                                                                                                                                                                                              | Il prodotto non contiene e non è stato fabbricato utilizzando nanomateriali (Reg.CE N° 1169/2011)                                                                                                                                                                                                                                                                                                                                                                                               |                          |                                   |                                    |
| Autocontrollo                                                                                                                                                                                                                                                                                                                                                                                                                                                                                                                                                                                                                                              | Prodotto sottoposto al regime previsto dal programma aziendale di autocontrollo come da pacchetto di igiene Reg. (CE) 852/2004                                                                                                                                                                                                                                                                                                                                                                  |                          |                                   |                                    |
| OGM                                                                                                                                                                                                                                                                                                                                                                                                                                                                                                                                                                                                                                                        | Il prodotto non contiene e non è stato fabbricato utilizzando organismi geneticamente modificati (EEC Reg. 1829/2003 e 1830/2003)                                                                                                                                                                                                                                                                                                                                                               |                          |                                   |                                    |
| Conservazione                                                                                                                                                                                                                                                                                                                                                                                                                                                                                                                                                                                                                                              | Conservare in luogo fresco, asciutto e ventilato, al riparo dalla luce, nei contenitori originali, ben chiusi e lontano da fonti di calore. Sigillare la confezione dopo l'uso.                                                                                                                                                                                                                                                                                                                 |                          |                                   |                                    |
| Interazioni con farmaci                                                                                                                                                                                                                                                                                                                                                                                                                                                                                                                                                                                                                                    | Non sono disponibili informazioni che permettano di stabilire le precauzioni di carattere generale o precauzioni specifiche concernenti interazioni con farmaci, gli effetti teratogeni o non teratogeni in gravidanza, l'allattamento o l'uso pediatrico. Per ulteriori informazioni consultare anche la monografia su MyrLiq® prodotta da Biosfered S.r.l. (www.biosfered.com). Questa nota non costituisce parere medico, che va comunque consultato all'insorgenza di un qualsiasi sintomo. |                          |                                   |                                    |
| Controindicazioni e avvertenze                                                                                                                                                                                                                                                                                                                                                                                                                                                                                                                                                                                                                             | Ipersensibilità accertata verso il prodotto                                                                                                                                                                                                                                                                                                                                                                                                                                                     |                          |                                   |                                    |
| Finalità fisiologiche e salutistiche                                                                                                                                                                                                                                                                                                                                                                                                                                                                                                                                                                                                                       | Consultare la monografia su MyrLiq® prodotta da Biosfered S.r.l. (www.biosfered.com)                                                                                                                                                                                                                                                                                                                                                                                                            |                          |                                   |                                    |
| Confezionamento                                                                                                                                                                                                                                                                                                                                                                                                                                                                                                                                                                                                                                            | Sacco interno in PE rivestito con foglio di alluminio. I materiali utilizzati sono idonei al contatto o al confezionamento di prodotti alimentari.                                                                                                                                                                                                                                                                                                                                              |                          |                                   |                                    |
| Data di retest                                                                                                                                                                                                                                                                                                                                                                                                                                                                                                                                                                                                                                             | 2 anni dalla data di produzione                                                                                                                                                                                                                                                                                                                                                                                                                                                                 |                          |                                   |                                    |
| Allergene                                                                                                                                                                                                                                                                                                                                                                                                                                                                                                                                                                                                                                                  |                                                                                                                                                                                                                                                                                                                                                                                                                                                                                                 | ESISTE NEL<br>PRODOTTO?  | ESISTE NELLA LINEA<br>PRODUTTIVA? | ESISTE NEL LUOGO DI<br>STOCCAGGIO? |
| Biossido di zolfo e solfiti (specificare la quantità se più alta di 10 ppm o 10 mg/kg)                                                                                                                                                                                                                                                                                                                                                                                                                                                                                                                                                                     |                                                                                                                                                                                                                                                                                                                                                                                                                                                                                                 | NO                       | NO                                | NO                                 |
| Di semi di arachidi e prodotti derivati (compreso l'olio)                                                                                                                                                                                                                                                                                                                                                                                                                                                                                                                                                                                                  |                                                                                                                                                                                                                                                                                                                                                                                                                                                                                                 | NO                       | NO                                | NO                                 |
| Anacardio - guscio (compreso l'olio)                                                                                                                                                                                                                                                                                                                                                                                                                                                                                                                                                                                                                       |                                                                                                                                                                                                                                                                                                                                                                                                                                                                                                 | NO                       | NO                                | NO                                 |
| Noce (compreso l'olio)                                                                                                                                                                                                                                                                                                                                                                                                                                                                                                                                                                                                                                     |                                                                                                                                                                                                                                                                                                                                                                                                                                                                                                 | NO                       | NO                                | NO                                 |
| Nocciola (compreso l'olio)                                                                                                                                                                                                                                                                                                                                                                                                                                                                                                                                                                                                                                 |                                                                                                                                                                                                                                                                                                                                                                                                                                                                                                 | NO                       | NO                                | NO                                 |
| Noce brasiliana (compreso l'olio)                                                                                                                                                                                                                                                                                                                                                                                                                                                                                                                                                                                                                          |                                                                                                                                                                                                                                                                                                                                                                                                                                                                                                 | NO                       | NO                                | NO                                 |
| Noce Pecan (compreso l'olio)                                                                                                                                                                                                                                                                                                                                                                                                                                                                                                                                                                                                                               |                                                                                                                                                                                                                                                                                                                                                                                                                                                                                                 | NO                       | NO                                | NO                                 |
| Noce Macadamia (compreso l'olio)                                                                                                                                                                                                                                                                                                                                                                                                                                                                                                                                                                                                                           |                                                                                                                                                                                                                                                                                                                                                                                                                                                                                                 | NO                       | NO                                | NO                                 |
| Pistacchio - noce (compreso l'olio)                                                                                                                                                                                                                                                                                                                                                                                                                                                                                                                                                                                                                        |                                                                                                                                                                                                                                                                                                                                                                                                                                                                                                 | NO                       | NO                                | NO                                 |
| Pinoli (compreso l'olio)                                                                                                                                                                                                                                                                                                                                                                                                                                                                                                                                                                                                                                   |                                                                                                                                                                                                                                                                                                                                                                                                                                                                                                 | NO                       | NO                                | NO                                 |
| Mandorla (compreso l'olio)                                                                                                                                                                                                                                                                                                                                                                                                                                                                                                                                                                                                                                 |                                                                                                                                                                                                                                                                                                                                                                                                                                                                                                 | NO                       | NO                                | NO                                 |
| Uova e prodotti derivati                                                                                                                                                                                                                                                                                                                                                                                                                                                                                                                                                                                                                                   |                                                                                                                                                                                                                                                                                                                                                                                                                                                                                                 | NO                       | NO                                | NO                                 |
| Mollusco e prodotti derivati                                                                                                                                                                                                                                                                                                                                                                                                                                                                                                                                                                                                                               |                                                                                                                                                                                                                                                                                                                                                                                                                                                                                                 | NO                       | NO                                | NO                                 |
| Pesci-crostaicei e prodotti derivati (inclusa gelatina)                                                                                                                                                                                                                                                                                                                                                                                                                                                                                                                                                                                                    |                                                                                                                                                                                                                                                                                                                                                                                                                                                                                                 | NO                       | NO                                | NO                                 |
| Soia e prodotti derivati (incluso lecitine)                                                                                                                                                                                                                                                                                                                                                                                                                                                                                                                                                                                                                |                                                                                                                                                                                                                                                                                                                                                                                                                                                                                                 | NO                       | NO                                | NO                                 |
| Latte e prodotti lattiero-caseari contenenti lattosio (In caso di presenza specificare la quantità)                                                                                                                                                                                                                                                                                                                                                                                                                                                                                                                                                        |                                                                                                                                                                                                                                                                                                                                                                                                                                                                                                 | NO                       | NO                                | NO                                 |
| Semi di sesamo e prodotti derivati (compreso l'olio)                                                                                                                                                                                                                                                                                                                                                                                                                                                                                                                                                                                                       |                                                                                                                                                                                                                                                                                                                                                                                                                                                                                                 | NO                       | NO                                | NO                                 |
| Lupini (lat.Lupinus ) e prodotti derivati                                                                                                                                                                                                                                                                                                                                                                                                                                                                                                                                                                                                                  |                                                                                                                                                                                                                                                                                                                                                                                                                                                                                                 | NO                       | NO                                | NO                                 |
| Sedano e prodotti derivati                                                                                                                                                                                                                                                                                                                                                                                                                                                                                                                                                                                                                                 |                                                                                                                                                                                                                                                                                                                                                                                                                                                                                                 | NO                       | NO                                | NO                                 |
| Senape e prodotti derivati                                                                                                                                                                                                                                                                                                                                                                                                                                                                                                                                                                                                                                 |                                                                                                                                                                                                                                                                                                                                                                                                                                                                                                 | NO                       | NO                                | NO                                 |
| Lattice                                                                                                                                                                                                                                                                                                                                                                                                                                                                                                                                                                                                                                                    |                                                                                                                                                                                                                                                                                                                                                                                                                                                                                                 | NO                       | NO                                | NO                                 |
| Gli eventuali metodi d'analisi non riportati sono metodi interni del produttore ottenibili su specifica richiesta. Le informazioni sopra riportate non Vi sollevano dall'obbligo di identificare il prodotto prima dell'impiego. La nostra società non si assume alcuna responsabilità per danni a persone o cose derivanti dall'impiego dei prodotti da noi commercializzati. Questo documento è proprietà esclusiva di Biosfered S.r.l. ed ogni utilizzo non autorizzato sarà perseguito ai fini di legge. Le informazioni contenute in questo documento sono da intendersi riservate al solo ambito professionale e quindi non divulgabili al pubblico. |                                                                                                                                                                                                                                                                                                                                                                                                                                                                                                 |                          |                                   |                                    |

Sede amministrativa:

Via Paolo Veronese 202 - 10148 Torino, Italia

Tel 011 348 1511 FAX 011 348 1525

P. IVA: IT10910930014

info@biosfered.com

PEC: biosfered@mypec.eu

2 di 2
