# Supplementary material for: Efficacy of a Combination of N-Palmitoylethanolamide, Beta-Caryophyllene, Carnosic Acid, and Myrrh Extract on Chronic Neuropathic Pain: A Preclinical Study
Source: PubMed Central journal article supplement (PMC6610250; doi:10.3389/fphar.2019.00711), 2019-06-27
Supplement: Table_1.pdf [file Table_1.pdf]

**PRODUCT NAME: ROSEMARY EXTRACT CA 65%**

**CODE: 40322**

**Ingredients**                      Rosemary leaf Extract    100 %  
**Ingredients origin**            UE

**Physical – chemicals specifications**

**Appearance**                    Yellowish to brownish powder, relatively free flowing, with characteristics flavour and taste\*\*

**Solubility**                        Soluble in alcohol, acetone, and propylene glycol.  
                                          Insoluble in water. Practically soluble in vegetable oil.

| <u>Analytical specifications</u>                   | <u>Specifications</u> | <u>Method</u>              |
|----------------------------------------------------|-----------------------|----------------------------|
| <b>Loss on drying:</b>                             | Less than 2%          | Eur. Pharm. 8 Met 2.2.32   |
| <b>Heavy metals (as Pb)</b>                        | Less than 10 ppm      | Eur. Pharm. 8 Met 2.4.8. C |
| <b>Cadmium*</b>                                    | Less than 1 ppm       | Eur. Pharm. 8 Met 2.2.58.  |
| <b>Mercury*</b>                                    | Less than 0.1 ppm     | Eur. Pharm. 8 Met 2.2.58.  |
| <b>Lead*</b>                                       | Less than 2 ppm       | Eur. Pharm. 8 Met 2.2.58.  |
| <b>Arsenic*</b>                                    | Less than 1 ppm       | Eur. Pharm. 8 Met 2.2.58.  |
| <b>Carnosic acid</b><br>(HPLC ,vs standard, as db) | More than 65%         | NUTRAFUR MCL04 2004        |
| <b>Residual solvent (Acetone)</b>                  | Not more than 500 ppm | Eur. Pharm. 8 Met 2.4.24   |
| <b>Aflatoxins B1, B2, G1,G2*</b>                   | < 4 ppb               | HPLC/FLD                   |
| <b>Aflatoxins B1*</b>                              | < 2 ppb               | HPLC/FLD                   |
| <b>Benzo(a)pyrene*</b>                             | <10ppb                | Regulation EC 333/2007     |
| <b>Sum of Benzo(a)Pyrene,</b>                      | <50ppb                |                            |
| <b>Benzo(a)anthracene,</b>                         |                       | Regulation EC 333/2007     |
| <b>Benzo(b)fluoranthene and chrysene*</b>          |                       |                            |
| <b><u>Microbiology assay</u></b>                   |                       |                            |
| <b>Total Plate count</b>                           | Less than 1000 cfu/g  | Eur. Pharm. 8 Met 2.6.12   |
| <b>Yeast and Mould</b>                             | Less than 100 cfu/g   | Eur. Pharm. 8 Met 2.6.12   |
| <b>E. Coli</b>                                     | Negative/g            | Eur. Pharm. 8 Met 2.6.13   |
| <b>Salmonella spp</b>                              | Negative/25g          | Eur. Pharm. 8 Met 2.6.13   |

(\*) Analyzed two batches per year, in accordance with Nutrafur HACCP.

(\*\*) Color variations may occur from batch to batch

**Pesticides statement**                      In compliance with the correspondent European Regulation for this product.

**Absence of foreign matters**            Over 1 mm (screen).

**Nutritional data**

|                             |           |
|-----------------------------|-----------|
| Water (%)                   | 0.5-2.0   |
| Carbohydrates (%)           | 0.5-1.0   |
| Lipids (%)                  | 20.0-25.0 |
| Proteins (Nx 6.25) (%)      | 0.5-1.0   |
| Total Diterpenes (%)        | 68.0-75.0 |
| Other Polyphenols           | 0.5-2.0   |
| Mineral Salts (%)           | 0.1-0.5   |
| Energetic Value (Kcal/100g) | 130-140   |

**Shelflife**                                      12 months unopened stored in a cool and dry location.

**Packaging**                                    Double food grade propylene bag in cardboard drums.

**Storage and distribution**                Keep well closed and in well ventilated places.

**Applications**                                It is used in lipid based Food. Potential regulation of physiological oxidative status.

**Status**                                            No GMO Product.  
                                                           Not Irradiated Product.  
                                                           This product is not at risk concerning BSE/TSE.  
                                                           Non ETO  
                                                           HALAL and KOSHER certificate

**Legal status:** Rosemary extracts are a 100% natural product approved by:

- FDA Revision of 21 Code of Federal Regulation 21 CFR, Part 182-20.
- FEMA NUMBER 2992.
- Regulation (CE) No. 1831/2003
- Regulation 231/2012/EC (E392)

**Allergen statement**

|                                                                                                                                                                                                                                                                                                                                                                                                                                                                                                                      | ABSENT | PRESENT                  | CROSS                    |
|----------------------------------------------------------------------------------------------------------------------------------------------------------------------------------------------------------------------------------------------------------------------------------------------------------------------------------------------------------------------------------------------------------------------------------------------------------------------------------------------------------------------|--------|--------------------------|--------------------------|
| Cereal containing, gluten and products thereof                                                                                                                                                                                                                                                                                                                                                                                                                                                                       | X      | <input type="checkbox"/> | <input type="checkbox"/> |
| Crustaceans and products thereof                                                                                                                                                                                                                                                                                                                                                                                                                                                                                     | X      | <input type="checkbox"/> | <input type="checkbox"/> |
| Eggs and products thereof                                                                                                                                                                                                                                                                                                                                                                                                                                                                                            | X      | <input type="checkbox"/> | <input type="checkbox"/> |
| Fish and product thereof                                                                                                                                                                                                                                                                                                                                                                                                                                                                                             | X      | <input type="checkbox"/> | <input type="checkbox"/> |
| Peanuts and products thereof                                                                                                                                                                                                                                                                                                                                                                                                                                                                                         | X      | <input type="checkbox"/> | <input type="checkbox"/> |
| Soybeans and products thereof                                                                                                                                                                                                                                                                                                                                                                                                                                                                                        | X      | <input type="checkbox"/> | <input type="checkbox"/> |
| Milk and products thereof                                                                                                                                                                                                                                                                                                                                                                                                                                                                                            | X      | <input type="checkbox"/> | <input type="checkbox"/> |
| Nuts, namely: almonds ( <i>Amygdalus communis</i> L.), hazelnuts ( <i>Corylus avellana</i> ), walnuts ( <i>Juglans regia</i> ), cashews ( <i>Anacardium occidentale</i> ), pecan nuts ( <i>Carya illinoensis</i> (Wangenh.) K. Koch), Brazil nuts ( <i>Bertholletia excelsa</i> ), pistachio nuts ( <i>Pistacia vera</i> ), macadamia or Queensland nuts ( <i>Macadamia ternifolia</i> ), and products thereof, except for nuts used for making alcoholic distillates including ethyl alcohol of agricultural origin | X      | <input type="checkbox"/> | <input type="checkbox"/> |
| Celery and products thereof                                                                                                                                                                                                                                                                                                                                                                                                                                                                                          | X      | <input type="checkbox"/> | <input type="checkbox"/> |
| Mustard and products thereof                                                                                                                                                                                                                                                                                                                                                                                                                                                                                         | X      | <input type="checkbox"/> | <input type="checkbox"/> |
| Sesame seeds and products thereof                                                                                                                                                                                                                                                                                                                                                                                                                                                                                    | X      | <input type="checkbox"/> | <input type="checkbox"/> |
| Sulphur dioxide and sulphites                                                                                                                                                                                                                                                                                                                                                                                                                                                                                        | X      | <input type="checkbox"/> | <input type="checkbox"/> |
| Lupin and products thereof                                                                                                                                                                                                                                                                                                                                                                                                                                                                                           | X      | <input type="checkbox"/> | <input type="checkbox"/> |
| Molluscs and products thereof                                                                                                                                                                                                                                                                                                                                                                                                                                                                                        | X      | <input type="checkbox"/> | <input type="checkbox"/> |
