# Supplementary material for: Efficacy of a Combination of N-Palmitoylethanolamide, Beta-Caryophyllene, Carnosic Acid, and Myrrh Extract on Chronic Neuropathic Pain: A Preclinical Study
Source: PubMed Central journal article supplement (PMC6610250; doi:10.3389/fphar.2019.00711), 2019-06-27
Supplement: Table_4.pdf [file Table_4.pdf]

**TECHNICAL DATA SHEET**

Last Version: April 2017

PRODUCT NAME: **PALMITOYLETHANOLAMIDE FINE FLAKES**  
 CODE PRODUCT: PEAS01  
 COUNTRY OF ORIGIN: ITALY  
 PACKAGING: 5, 10 or 25 Kg in paper drum-sealed aluminum-PE-bags

| PHYSICOCHEMICAL CHARACTERISTICS | SPECIFICATIONS          | METHOD      |
|---------------------------------|-------------------------|-------------|
| APPEARANCE                      | LAMELLA SHAPED , FLAKES | POSITIVE    |
| IDENTIFICATION                  | POSITIVE (NMR)          | POSITIVE    |
| PURITY (%)                      | ≥ 99.0                  | INT. METHOD |
| ASSAY (%)                       | ≥ 99.0                  | INT. METHOD |
| PALMITOYLDIETHANOLAMIDE (PDEA)  | ABSENT                  | INT. METHOD |
| TOTAL OTHER ETANOLAMIDES (%)    | NMT 1.0                 | INT. METHOD |
| TOTAL IMPURITIES (%)            | NMT 1.0                 | INT. METHOD |
| WATER CONTENT (%)               | NMT 1.0                 | EP; 2.5.12  |
| MELTING POINT (°C)              | 98.0 – 100.0            | EP; 2.5.15  |
| HEAVY METALS (ppm)              | NMT 20                  | INT. METHOD |
| RESIDUAL SOLVENTS (ppm)         | NMT 250                 | INT. METHOD |
| BULK DENSITY ( G/ML )           | 0.37 – 0.41             | INT. METHOD |

| MICROBIOLOGICAL           | SPECIFICATIONS | METHOD     |
|---------------------------|----------------|------------|
| TOTAL PLATE COUNT (CFU/g) | NMT 1000       | EP; 2.6.12 |
| YEAST AND MOLDS (CFU/g)   | NMT 100        | EP; 2.6.12 |
| ENTEROBACTERIACEE (CFU/g) | NMT 100        | EP; 2.6.13 |
| E. COLI (25G)             | ABSENT         | EP; 2.6.13 |
| SALMONELLA (25G)          | ABSENT         | EP; 2.6.13 |

**STORAGE**

- Store containers at room temperature in a dry place, away from light and direct air exposure.
- Shelf life: 24 months in the original container

Certifications: Palmitoylethanolamide is Kosher certified and suitable for food application
